# Supplementary material for: Fabrication of a novel Ni3N/Ni4N heterojunction as a non-noble metal co-catalyst to boost the H2 evolution efficiency of Zn0.5Cd0.5S
Source: Royal Society of Chemistry journal article supplement (doi:10.1039/c9nj06429j), 2020-01-01
Supplement: c9nj06429j1.pdf [file c9nj06429j1.pdf]

## **First fabrication of Ni<sub>3</sub>N/Ni<sub>4</sub>N heterojunction to boost the H<sub>2</sub> evolution efficiency of Zn<sub>0.5</sub>Cd<sub>0.5</sub>S**

Zhanbin Jin,<sup>a</sup> Tingting Wei,<sup>a</sup> Fengyan Li,<sup>\*a</sup> Qiu Zhang,<sup>a</sup> and Lin Xu<sup>\*a</sup>

*Key Laboratory of Polyoxometalate Science of Ministry of Education, Department of Chemistry, Northeast Normal University, Changchun, Jilin 130024, P. R. cChina*

### **Material characterizations**

The composition and phase composition of the samples were studied by powder X-ray diffraction (D ≤ Max200PC, Japanese; Cu K α = 1.5404). The scanning range of 2 theta is 10 °~ 80 °, and the scanning rate is 10 °min<sup>-1</sup>. The microstructure, size and EDX-mapping of the samples were studied by scanning electron microscope (Hitachi SU-8000 FE-SEM). The transmission electron microscope (TEM) was carried out on JEM-2100-F microscope with acceleration voltage of 200 kV. The sample powder was uniformly dispersed in ethanol by ultrasonic treatment and the very thin suspension droplets were placed on the copper plate and then dry in the oven. Using monochromatic Al K α radiation as excitation source, X-ray photoelectron spectroscopy (XPS), has been carried out on USWHA 150 photoelectron spectrometer. The binding energy of XPS is related to the C1 peak at 284.8 eV of uncertain carbon on the surface. The specific surface area of Brunauer Emmett Teller (BET) of the product powder was determined by using the nitrogen adsorption/desorption isotherm obtained by a Micromerics ASAP 2020 nitrogen adsorption/desorption apparatus. Photoluminescence (PL) was measured on F-7000 fluorescence spectrophotometer. The UV-vis diffuse reflection spectrum (DRS) of the sample was detected by varian Cary 700 spectrophotometer from 200-800 nm and BaSO<sub>4</sub> was used as the reflectance standard. All the photocurrent measurements such as electrochemical impedance spectra (EIS) and Transient photocurrent were measured in 0.5 M Na<sub>2</sub>SO<sub>4</sub> solution electrolyte on an Ivium workstation (Ivium Stat.h, Ivium Holland, Inc.).

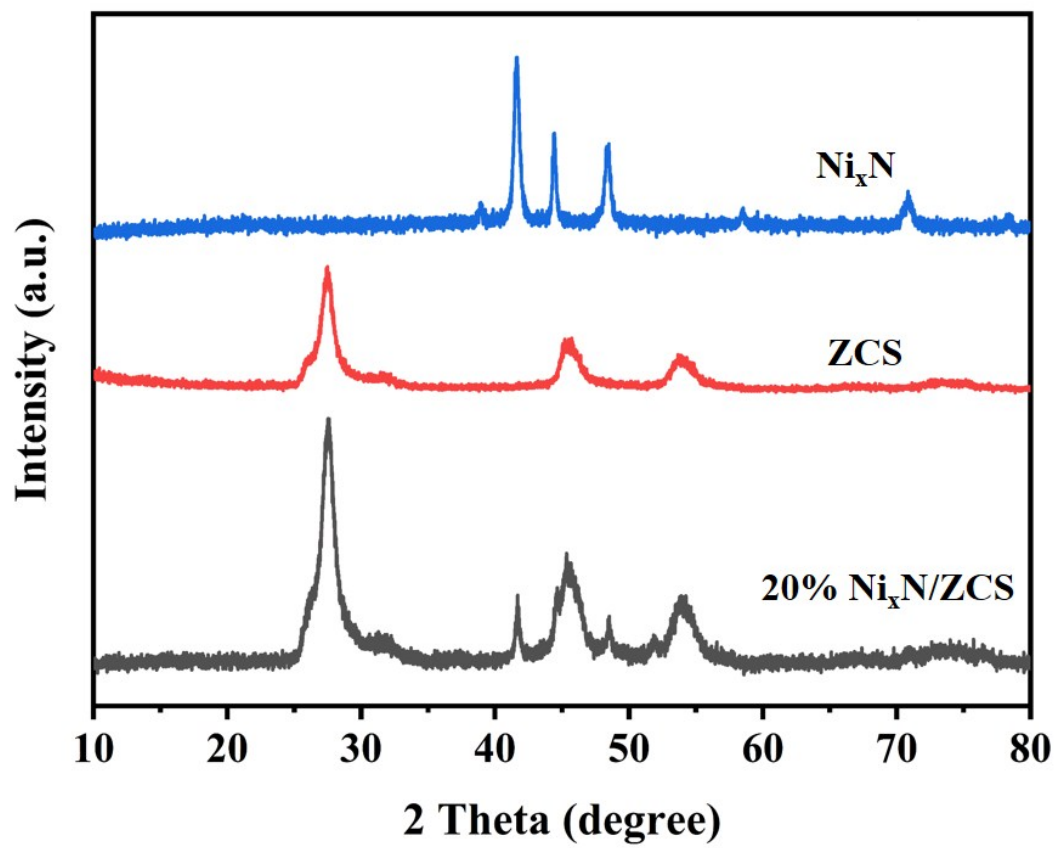

**Fig. S1.** The XRD of ZCS,  $\text{Ni}_x\text{N}$  and 20%  $\text{Ni}_x\text{N}/\text{ZCS}$  samples.

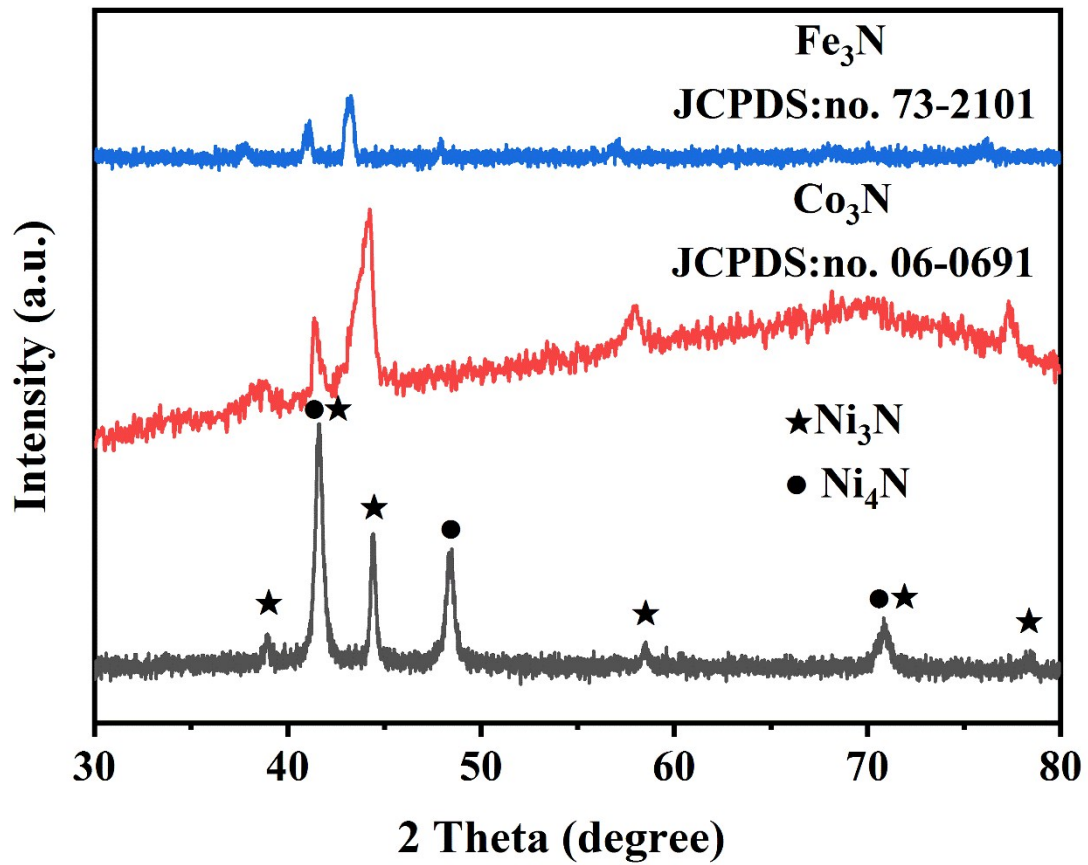

Fig. S2. The XRD of Fe<sub>3</sub>N, Ni<sub>3</sub>N and Co<sub>3</sub>N samples

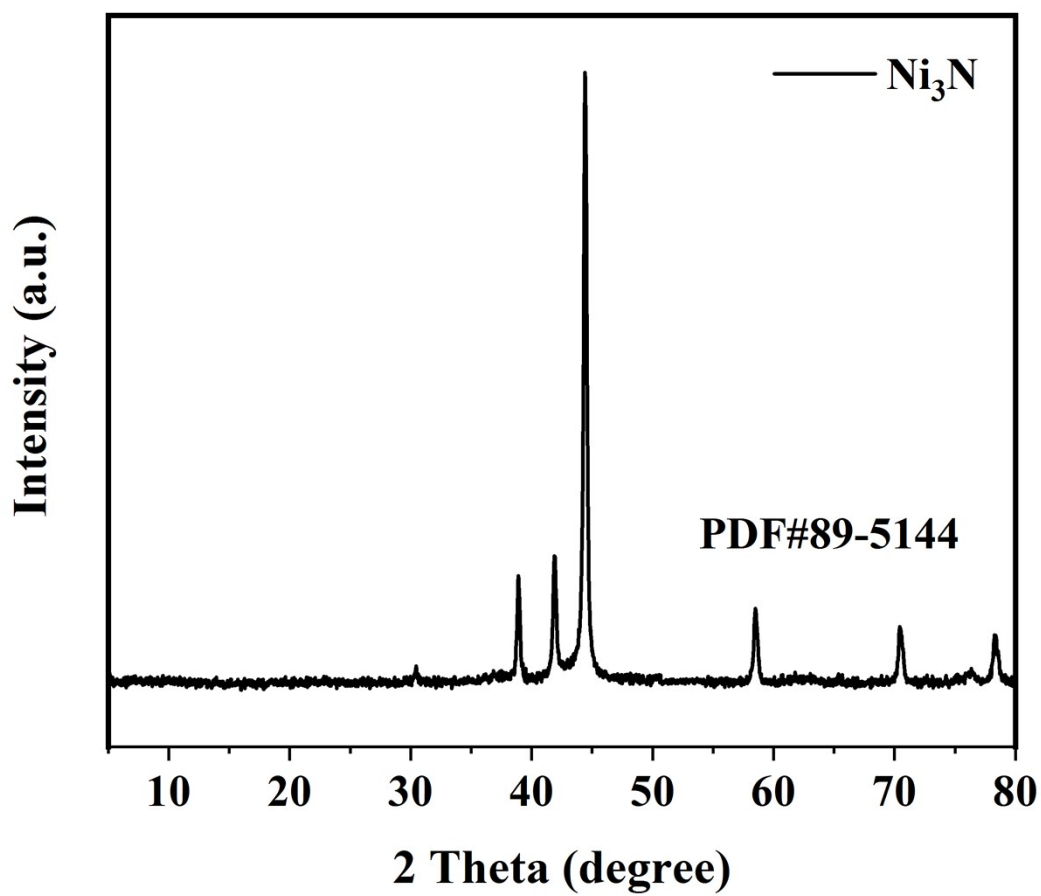

Fig. S3. The XRD of  $\text{Ni}_3\text{N}$  sample.

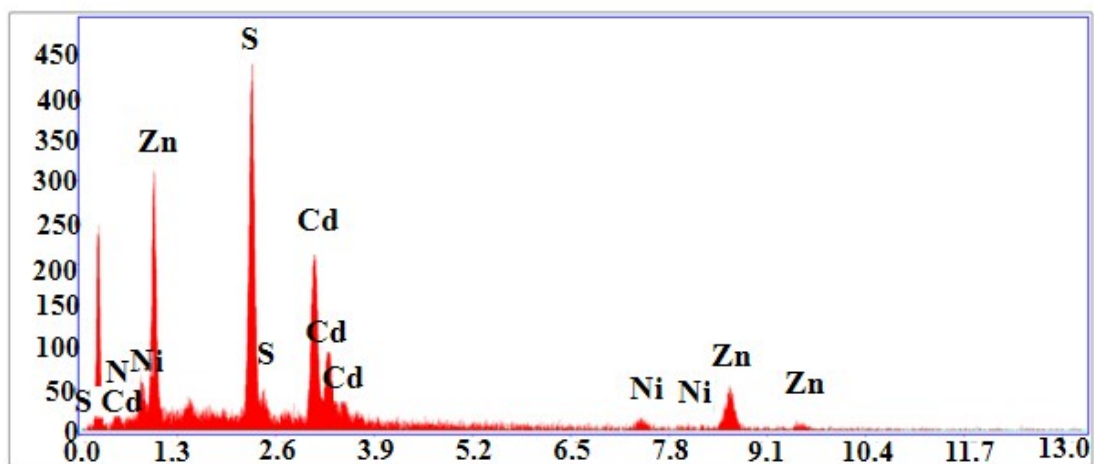

| Elements | Weight% | Atom% | Intensity | Error % |
|----------|---------|-------|-----------|---------|
| N K      | 0.05    | 0.21  | 0.03      | 99.99   |
| S K      | 30.57   | 54.51 | 325.18    | 5.69    |
| CdL      | 42.56   | 21.65 | 187.17    | 6.35    |
| NiK      | 1.64    | 1.60  | 5.95      | 58.71   |
| ZnK      | 25.18   | 22.03 | 57.07     | 11.51   |

**Fig. S4.** EDX data of sample 2% Ni<sub>x</sub>N/ZCS.

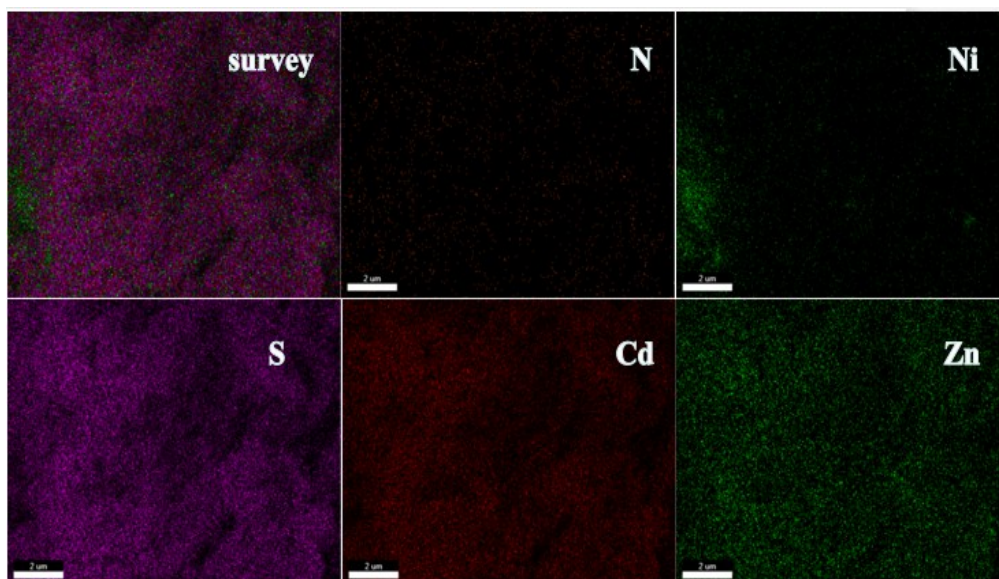

**Fig. S5.** SEM-Mapping images for nitrogen, nickel, sulphur, cadmium, zinc.

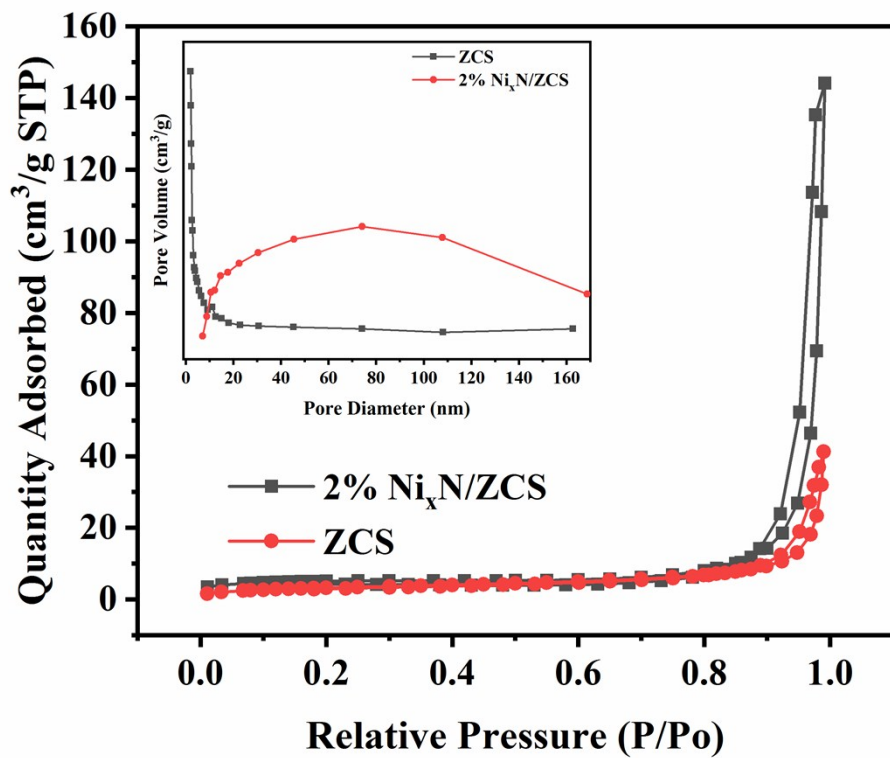

Fig. S6. Nitrogen adsorption-desorption isotherms.

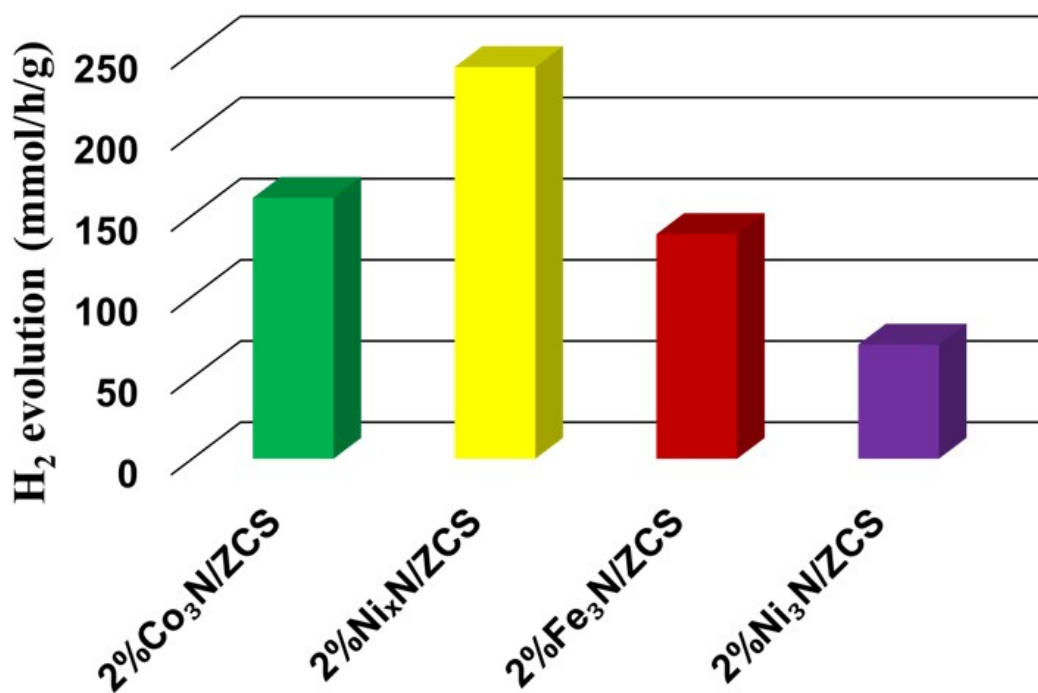

Fig. S7. Rate of H<sub>2</sub> evolution of 2% Co<sub>3</sub>N/ZCS, 2% Ni<sub>x</sub>N/ZCS, 2% Fe<sub>3</sub>N/ZCS and

2%Ni<sub>3</sub>N/ZCS

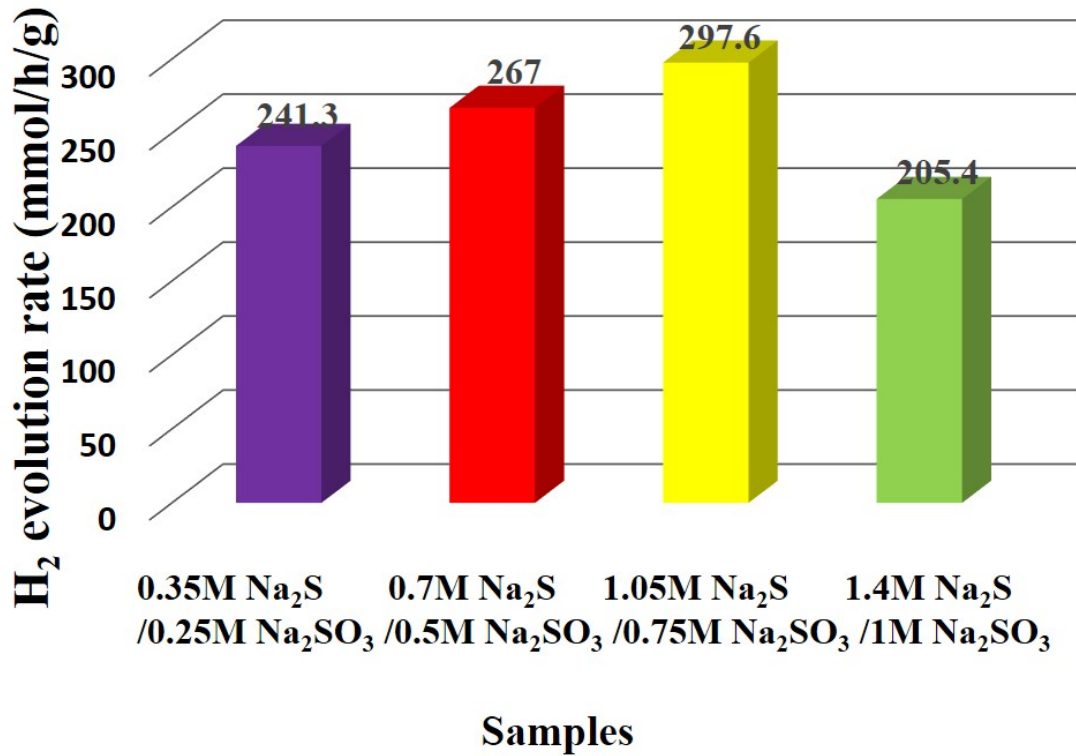

**Fig. S8** Rate of H<sub>2</sub> evolution over the 2% Ni<sub>x</sub>N/ZCS sample with different concentrations of sacrificial reagents: a: 0.35 M Na<sub>2</sub>S/0.25 M Na<sub>2</sub>SO<sub>3</sub>, b: 0.7 M Na<sub>2</sub>S/0.5 M Na<sub>2</sub>SO<sub>3</sub>, c: 1.05 M Na<sub>2</sub>S/0.75 M Na<sub>2</sub>SO<sub>3</sub>, and d: 1.4 M Na<sub>2</sub>S/1.0 M Na<sub>2</sub>SO<sub>3</sub>

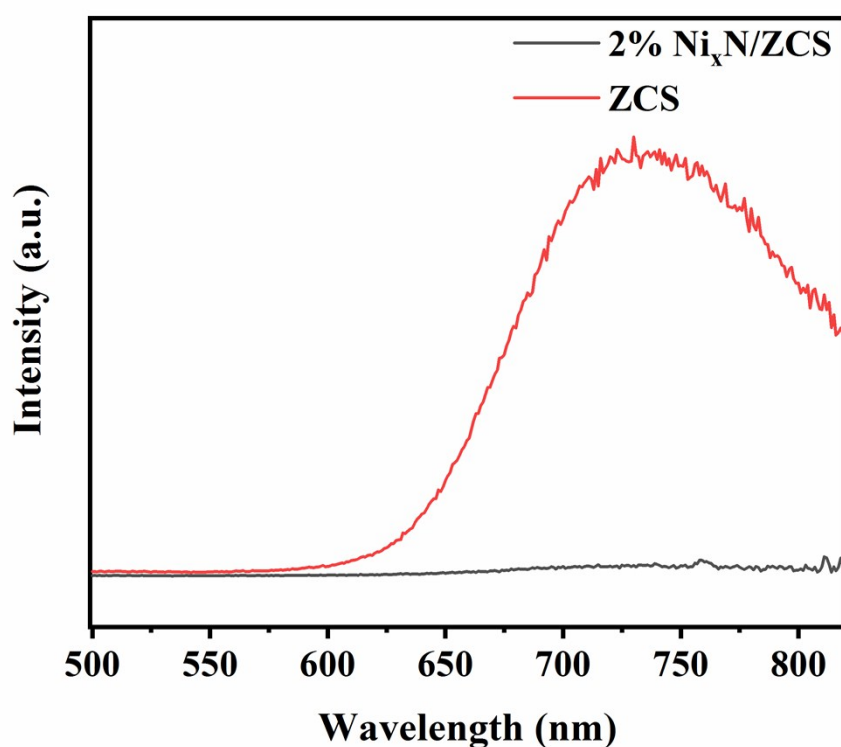

**Fig. S9.** Photoluminescence spectra of ZCS and 2% Ni<sub>x</sub>N/ZCS and the excitation wavelength was 410 nm.

**Table S1** Photocatalytic H<sub>2</sub> evolution activity over different ZCS photocatalysts

| Cocatalysts       | Light harvesting                      | Light source                               | Weight(mg)/<br>Solution (mL),<br>sacrificial agent                         | Activity<br>(mmol g <sup>-1</sup> h <sup>-1</sup> ) | A.Q.E.<br>(%) | Ref.      |
|-------------------|---------------------------------------|--------------------------------------------|----------------------------------------------------------------------------|-----------------------------------------------------|---------------|-----------|
| Ni <sub>x</sub> N | Zn <sub>0.5</sub> Cd <sub>0.5</sub> S | 300 W Xe lamp with a 420 nm cut-off filter | 1/200, 0.25 M Na <sub>2</sub> SO <sub>3</sub> and 0.35 M Na <sub>2</sub> S | 241.3                                               | 43.8          | This work |
| Fe <sub>3</sub> N | Zn <sub>0.5</sub> Cd <sub>0.5</sub> S | 300 W Xe lamp with a 420 nm cut-off filter | 1/200, 0.25 M Na <sub>2</sub> SO <sub>3</sub> and 0.35 M Na <sub>2</sub> S | 138.4                                               | --            | This work |
| Co <sub>3</sub> N | Zn <sub>0.5</sub> Cd <sub>0.5</sub> S | 300 W Xe lamp with a 420 nm cut-off filter | 1/200, 0.25 M Na <sub>2</sub> SO <sub>3</sub> and 0.35 M Na <sub>2</sub> S | 160.7                                               | 30.2          | 1         |
| NiCoP             | TiO <sub>2</sub>                      | 300 W Xe lamp                              | 20/80, 20% vol methanol                                                    | 1.54                                                | --            | 2         |



|                       |                                           |                                            |                                                                             |       |       |   |
|-----------------------|-------------------------------------------|--------------------------------------------|-----------------------------------------------------------------------------|-------|-------|---|
| Ni <sub>2</sub> P     | Zn <sub>0.5</sub> Cd <sub>0.5</sub> S     | 300 W Xe lamp with a 420 nm cut-off filter | 50/100, 0.25 M Na <sub>2</sub> SO <sub>3</sub> and 0.35 M Na <sub>2</sub> S | 41.26 | --    | 3 |
| NiO/Ni <sub>2</sub> P | g-C <sub>3</sub> N <sub>4</sub>           | 300 W Xe lamp with a 420 nm cut-off filter | 10/20, 10% triethanolamine                                                  | 0.504 | --    | 4 |
| Ni <sub>3</sub> N     | g-C <sub>3</sub> N <sub>4</sub>           | 300 W Xe lamp with a 420 nm cut-off filter | 5/250, 20 vol% triethanolamine                                              | 0.305 | 0.45  | 5 |
| NiS <sub>x</sub>      | Zn <sub>0.8</sub> Cd <sub>0.2</sub> S/rGO | 300 W Xe lamp with a 420 nm cut-off filter | 50/50, 10% lactic acid                                                      | 7.84  | 20.88 | 6 |
| Ni <sub>2</sub> P     | CNTs                                      | 350 W Xe lamp                              | 30/100, 10 vol% triethanolamine                                             | 19.25 | 5.8   | 7 |
| Ni <sub>2</sub> P     | MIL-125-NH <sub>2</sub>                   | 300 W Xe lamp with a 420 nm cut-off filter | 17/25, 20 vol% triethanolamine                                              | 3.878 | 27    | 8 |
| Ni <sub>3</sub> N     | g-C <sub>3</sub> N <sub>4</sub>           | 300 W Xe lamp with a 420 nm cut-off filter | 50/100, 10 vol% triethanolamine                                             | 0.169 | 0.11  | 9 |

|                   |     |                                            |                        |       |     |    |
|-------------------|-----|--------------------------------------------|------------------------|-------|-----|----|
| Ni <sub>2</sub> P | CdS | 300 W Xe lamp with a 420 nm cut-off filter | 10/75, 10% lactic acid | 17.95 | 4.2 | 10 |
|-------------------|-----|--------------------------------------------|------------------------|-------|-----|----|

1. Z. B. Jin, T. T. Wei, L. X. Li, F. Y. Li, R. Tao and L. Xu, *Dalton. Trans.*, 2019, **48**, 2676-2682.
2. R. Song, W. Zhou, B. Luo and D. W. Jing, *Appl. Surf. Sci.* 2017, **416**, 957-964.
3. T. P. Yu, Y. Y. Si, Z. H. Lv, K. H. Wang, Q. Zhang, X. Liu, G. X. Wang, G. W. Xie and L. H. Jiang, *Int. J. Hydrogen Energy*, 2019, **44**, 31832-31840.
4. J. W. Shi, Y. J. Zou, L. H. Cheng, D. D. Ma, D. K. Sun, S. M. Mao, L. W. Sun, C. He and Z. Y. Wang, *Chem. Eng. J.*, 2019, **378**, 122161.
5. J. H. Ge, Y. J. Liu, D. C. Jiang, L. Zhang and P. W. Du, *Chinese J. Catal.*, 2019, **40**, 160-167.
6. C. Xue, H. Li, H. An, B. L. Yang, J. J. Wei, and G. D. Yang, *ACS Catal.*, 2018, **8**, 1532-1545.
7. Z. X. Lin, Y. Zhao, J. H. Luo, S. J. Jiang, C. Z. Sun and S. Q. Song, *Adv. Funct. Mater.*, 2019, **1908797**.
8. S. Kampouri, T. N. Nguyen, C. P. Ireland, B. Valizadeh, F. M. Ebrahim, G. Capano, D. Ongari, A. Mace, N. Guijarro, K. Sivula, A. Sienkiewicz, L. Forro, B. Smit and K. C. Stylianou, *J. Mater. Chem. A*, 2018, **6**, 2476-2481.
9. L. Chen, H. J. Huang, Y. H. Zheng, W. H. Sun, Y. Zhao, P. S. Francis and X. X. Wang, *Dalton Trans.*, 2018, **47**, 12188-12196.
10. C. Liu, M. H. Xiong, B. Chai, J. T. Yan, G. Z. Fan and G. S. Song, *Catal. Sci. Technol.*, 2019, **9**, 6929-6937.
